# Supplementary material for: WT1-specific TCRs directed against newly identified peptides install antitumor reactivity against acute myeloid leukemia and ovarian carcinoma
Source: PubMed Central journal article supplement — J Immunother Cancer. 2022 Jun 21;10(6):e004409. doi: 10.1136/jitc-2021-004409 (PMC9214430; doi:10.1136/jitc-2021-004409), 2022-06-21
Supplement: jitc-2021-004409supp002.pdf [file jitc-2021-004409supp002.pdf]

## Supplemental data 1. Overview of the materials included in HLA ligandome analyses

| WT1 peptides eluted |              |         |           | Materials included in the HLA ligandome analyses |           |             |                     |                 |                  |                 |
|---------------------|--------------|---------|-----------|--------------------------------------------------|-----------|-------------|---------------------|-----------------|------------------|-----------------|
| Nr                  | Peptide      | HLA     | BMI score | Name                                             | WT1 expr. | Material    | Amount              | HLA-A           | HLA-B            | HLA-C           |
| 1                   | WTEGQSNHSTGY | A*01:01 | 43        | OVCA-G1                                          | 162%      | Solid tumor | 8 gram              | A*01:01 A*11:01 | B*08:01 B*35:01  | C*04:01 C*07:01 |
|                     |              |         | 33        | ALL-1833                                         | 9%*       | PB          | 62x10 <sup>9</sup>  | A*01 A*03       | B*18 B*35        | C*04 C*07       |
|                     |              |         | 41        | AML-4443                                         | 13%       | PB          | 110x10 <sup>9</sup> | A*01:01         | B*08:01          | C*07:01         |
|                     |              |         | 42        | AML-10197                                        | 27%       | PB          | 550x10 <sup>9</sup> | A*01:01 A*02:01 | B*08:01 B*44:03  | C*07:01 C*16:01 |
| 2                   | VLDFAPPGASAY | A*01:01 | 36        | AML-4443                                         | 13%       | PB          | 110x10 <sup>9</sup> | A*01:01         | B*08:01          | C*07:01         |
| 3                   | ALLPAVPSL    | A*02:01 | 31        | OVCA-L23                                         | 57%       | Ascites     | 7x10 <sup>9</sup>   | A*02:01 A*26:01 | B*38:01, B*44:02 | C*05:01 C*12:03 |
| 4                   | VLDFAPPGA    | A*02:01 | 26        | OVCA-L23                                         | 57%       | Ascites     | 7x10 <sup>9</sup>   | A*02:01 A*26:01 | B*38:01, B*44:02 | C*05:01 C*12:03 |
| 5                   | FGPPPPSQA    | A*02:01 | 42        | OVCA-L23                                         | 57%       | Ascites     | 7x10 <sup>9</sup>   | A*02:01 A*26:01 | B*38:01, B*44:02 | C*05:01 C*12:03 |
|                     |              |         | 20        | AML-10197                                        | 27%       | PB          | 550x10 <sup>9</sup> | A*01:01 A*02:01 | B*08:01 B*44:03  | C*07:01 C*16:01 |
| 6                   | AQFPNHSFK    | A*03:01 | 20        | Cell line-COV362.4                               | 9%        | Cell line   | 2x10 <sup>9</sup>   | A*03:01         | B*40:01          | C*03:04         |
| 7                   | HAAQFPNHSF   | B*35:01 | 36        | HCL-4512                                         | n.d.      | Spleen      | 100x10 <sup>9</sup> | A*02 A*29       | B*35             | C*04            |
| 8                   | TPYSSDNLY    | B*35:01 | 41        | ALL-2184                                         | 9%        | PB          | 610x10 <sup>9</sup> | A*11:01         | B*35:01 B*40:02  | C*02:02 C*04:01 |

## Supplemental data 2. MS data validation of the eight WT1-derived peptides

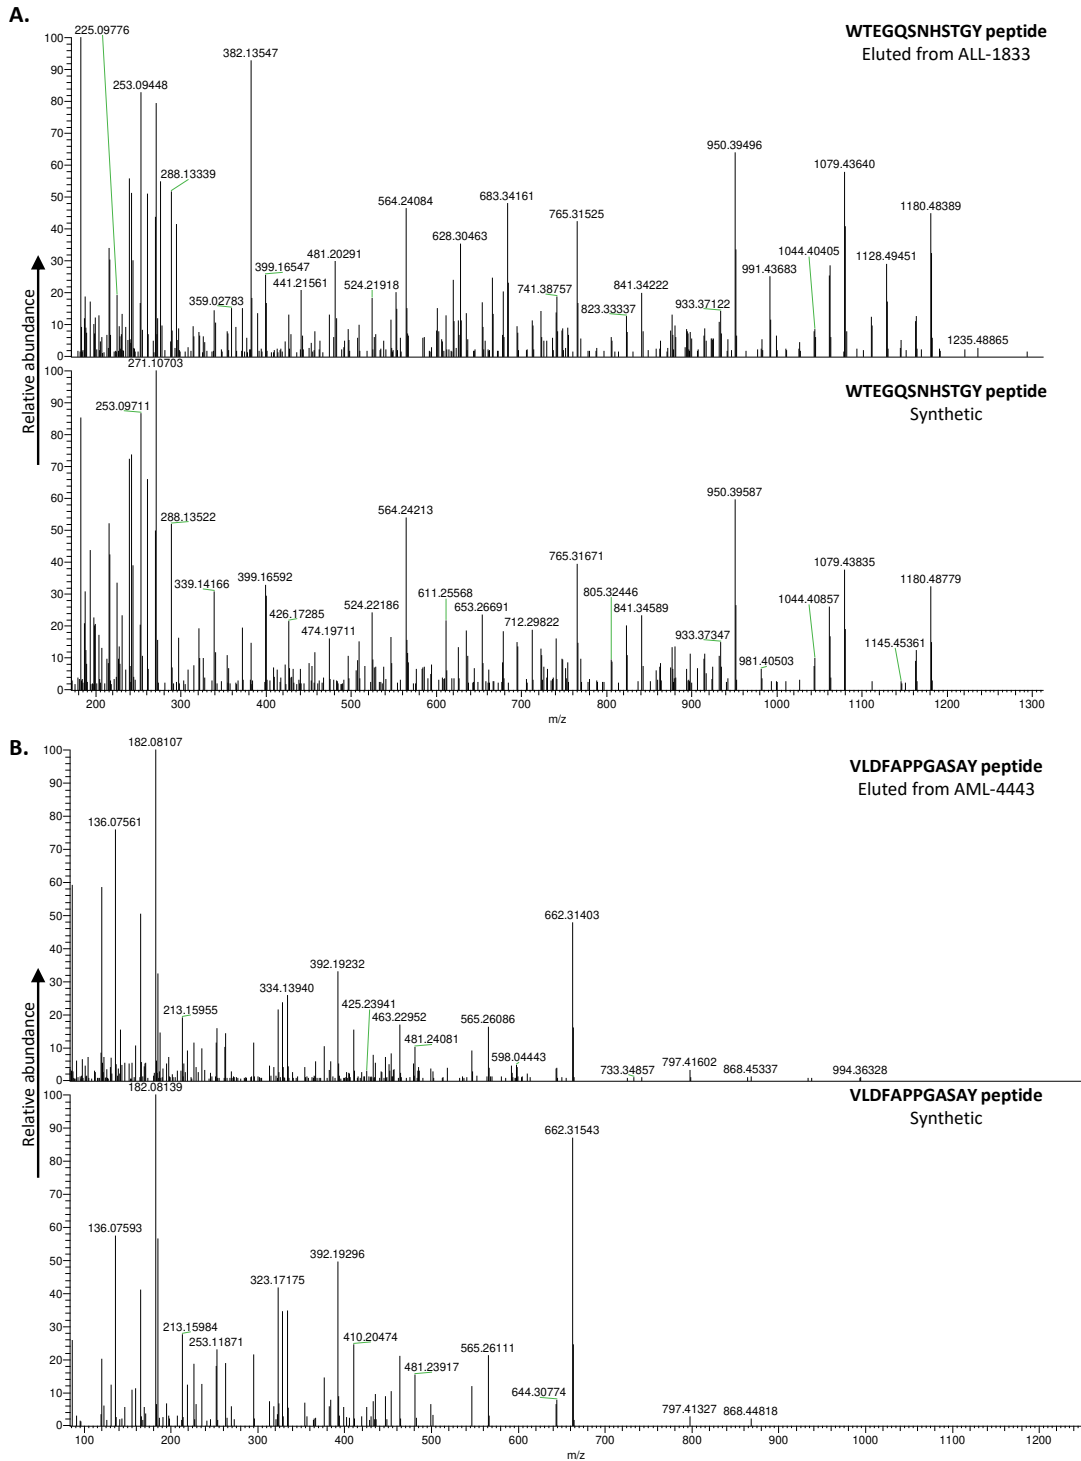

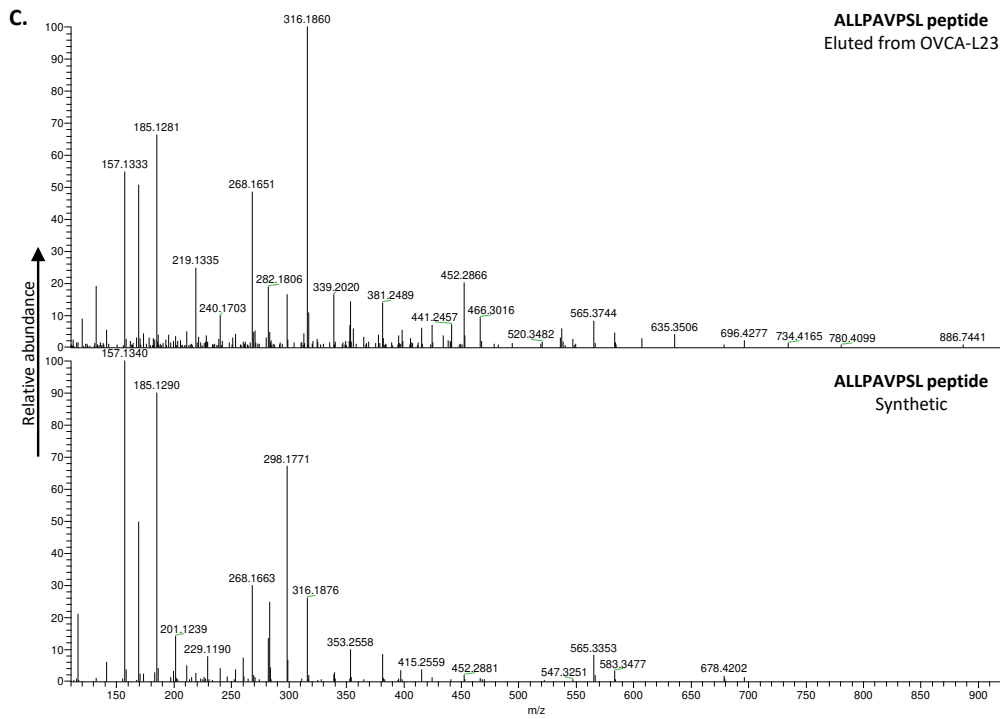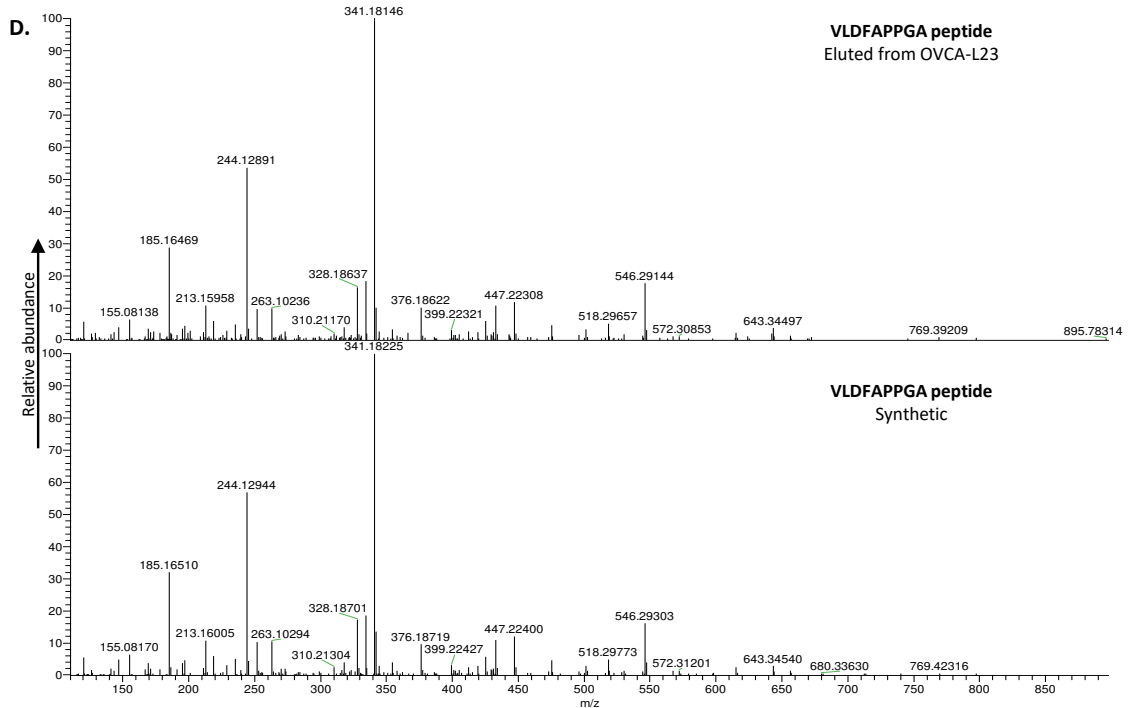

E.

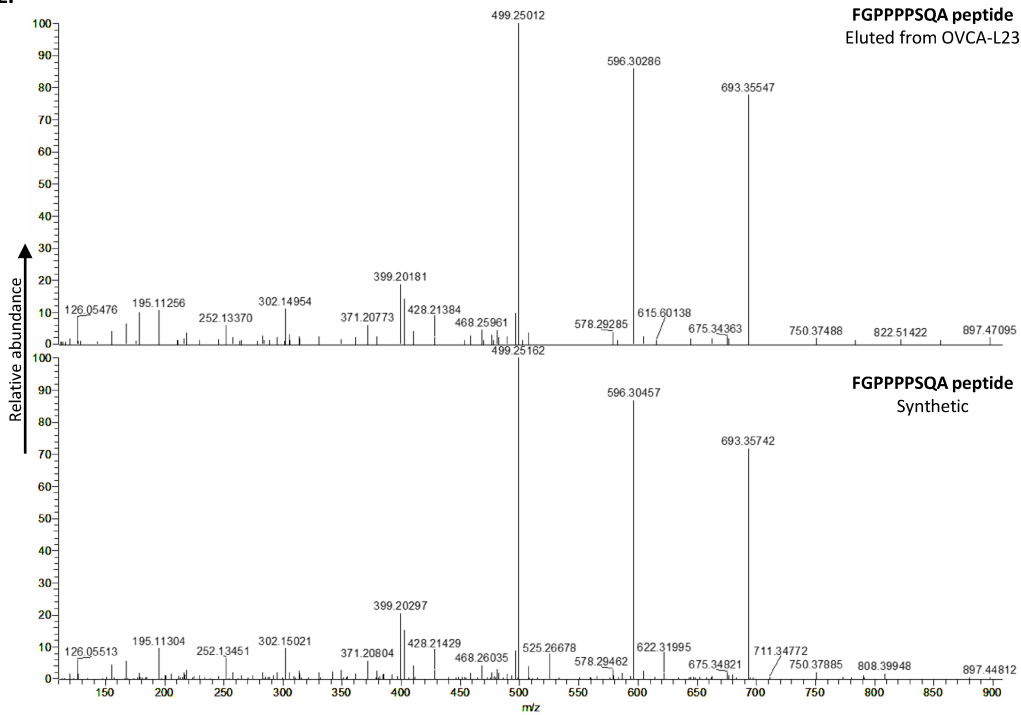

F.

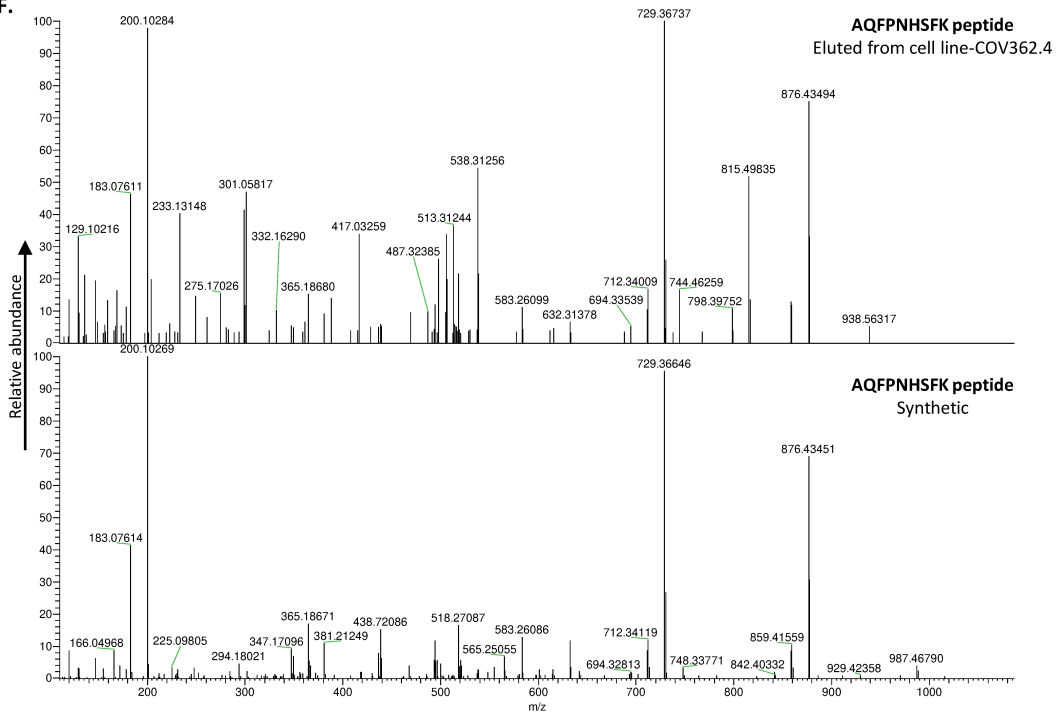

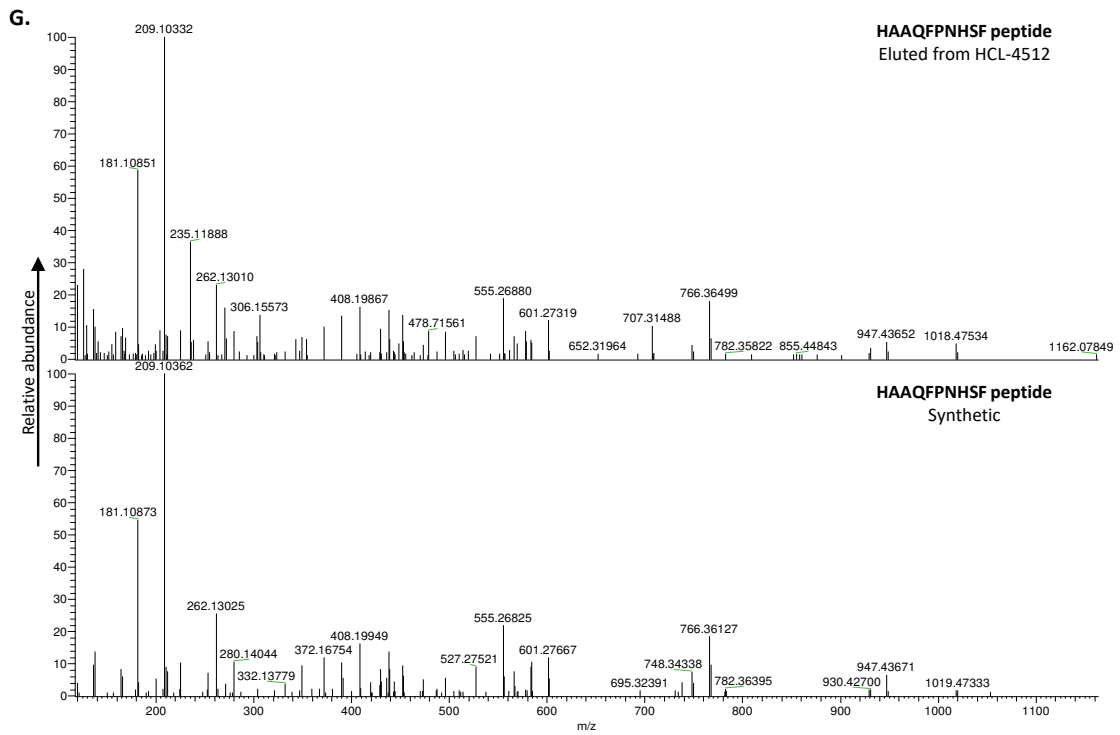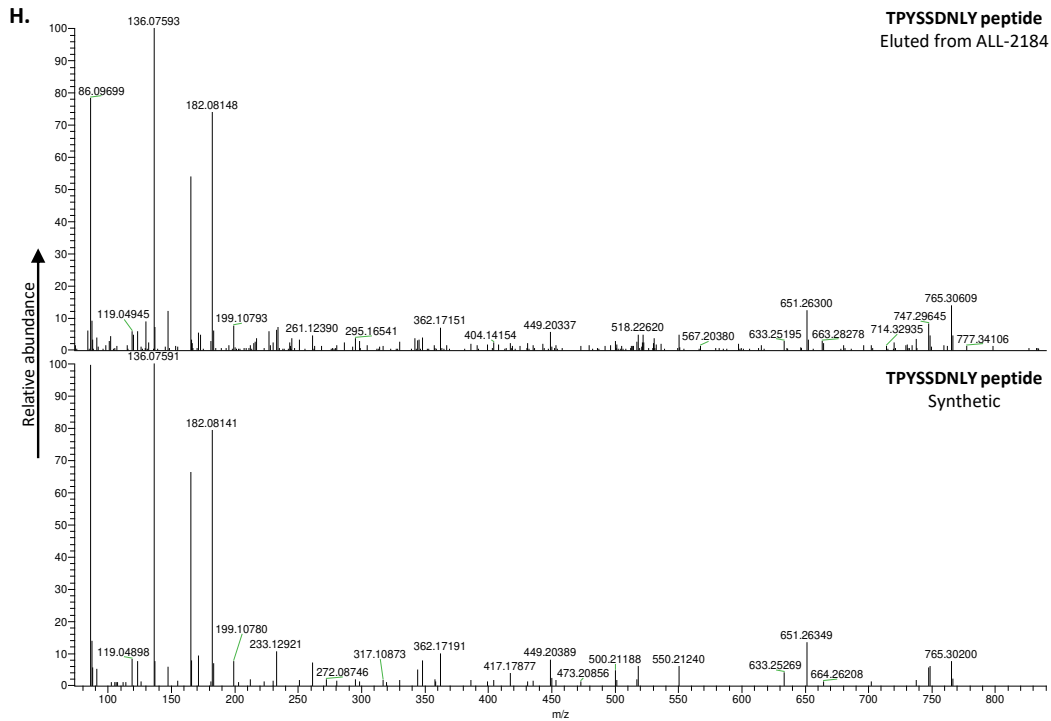

**Supplemental data 3. Overview of the number of T-cell clones screened per healthy donor and T-cell clones reactive against WT1 peptide and/or transduced WT1**

| Name   | HLA class I type              | Number of PBMCs (x10 <sup>6</sup> ) | Screened T-cell clones | T-cell clones reactive against WT1 peptide | T-cell clones reactive against transduced WT1 |
|--------|-------------------------------|-------------------------------------|------------------------|--------------------------------------------|-----------------------------------------------|
| OLA.01 | A03, A29, B35, C unknown      | 595                                 | 69                     | 13                                         | 2                                             |
| OLA.02 | A01, A31, B51, C04, C07       | 350                                 | 48                     | 12                                         | 1                                             |
| OLA.03 | A01, A03, B13, B35, C04, C06  | 1150                                | 102                    | 18                                         | 0                                             |
| OLA.04 | A24, A29, B15, C03, C16       | 565                                 | 134                    | 9                                          | 0                                             |
| OLA.05 | A03, B51, C03, C07            | 995                                 | 137                    | 24                                         | 1                                             |
| OLA.06 | A24, B07, B27, C unknown      | 900                                 | 576                    | 21                                         | 6                                             |
| OLA.07 | A03, A31, B07, B60, C07, C10  | 445                                 | 238                    | 9                                          | 1                                             |
| OLA.08 | A24, A29, B44, B51, C unknown | 795                                 | 658                    | 38                                         | 8                                             |
| OLA.09 | A03, A32, B07, B44, C05, C07  | 825                                 | 145                    | 11                                         | 1                                             |
| OLA.10 | A09, A28, B08, B18, C05, C07  | 755                                 | 520                    | 20                                         | 0                                             |
| OLA.11 | A23, A31, B44, B51, C04, C15  | 490                                 | 315                    | 13                                         | 0                                             |
| OLA.12 | A31, A28, B51, B60, C03       | 545                                 | 493                    | 22                                         | 4                                             |
| OLA.13 | A24, A32, B55, B61, C02, C03  | 305                                 | 199                    | 8                                          | 0                                             |
| OLA.14 | A24, A26, B39, B44, C02, C12  | 850                                 | 456                    | 6                                          | 2                                             |
| OLA.15 | A24, A33, B14, B40, C03, C08  | 490                                 | 20                     | 1                                          | 0                                             |
| OLA.16 | A30, A31, B18, B39, C05, C12  | 730                                 | 384                    | 17                                         | 7                                             |
| OLA.17 | A32, A33, B14, B40, C03, C08  | 455                                 | 331                    | 7                                          | 3                                             |
| OLA.18 | A01, A03, B57, B35, C04       | 575                                 | 87                     | 24                                         | 3                                             |
| OLA.19 | A03, A24, B44, B63, C05       | 585                                 | 514                    | 4                                          | 0                                             |
| OLA.20 | A03, A31, B50, B60, C06, C10  | 544                                 | 576                    | 19                                         | 1                                             |
| OLA.21 | A01, A68, B51, B08, C07       | 724                                 | 269                    | 11                                         | 0                                             |
| OLA.22 | A03, A24, B07, B35, C04, C07  | 710                                 | 267                    | 11                                         | 2                                             |
| OLA.23 | A03, B07, B35, C04, C07       | 580                                 | 179                    | 44                                         | 11                                            |
| OLA.24 | A32, B44, B18, C05, C07       | 565                                 | 316                    | 14                                         | 2                                             |
| OLA.25 | A01, A25, B37, B51, C unknown | 556                                 | 308                    | 25                                         | 7                                             |
| OLA.26 | A01, A03, B07, B44, C07       | 310                                 | 233                    | 29                                         | 7                                             |
| OLA.27 | A01, B39, B44, C05, C12       | 940                                 | 174                    | 11                                         | 1                                             |
| OLA.28 | A01, A11, B15, B35, C unknown | 800                                 | 168                    | 20                                         | 1                                             |
|        |                               | <b>18,129</b>                       | <b>7,916</b>           | <b>461</b>                                 | <b>71</b>                                     |

## Supplemental data 4. Overview of T-cell clones reactive against transduced WT1 and those TCRs further analyzed

| Nr | Peptide      | HLA     | Donors used for T-cell isolation | WT1-reactive T-cell clones | TCR analyzed |
|----|--------------|---------|----------------------------------|----------------------------|--------------|
| 1  | WTEGQSNHSTGY | A*01:01 | 23                               |                            |              |
| 2  | VLDFAPPGASAY | A*01:01 | 23                               | 4                          | 12.5H9       |
| 3  | ALLPAVPSL    | A*02:01 | 11                               | 5                          | 22.1H1       |
| 4  | VLDFAPPGA    | A*02:01 | 11                               | 19                         | 20.3D10      |
| 5  | FGPPPPSQA    | A*02:01 | 11                               | 7                          |              |
| 6  | AQFPNHFSK    | A*03:01 | 5                                | 1                          |              |
| 7  | HAAQFPNHFSF  | B*35:01 | 19                               | 18                         |              |
| 8  | TPYSSDNLY    | B*35:01 | 19                               | 3                          | 17.2G4       |
| 9  | RMFPNAPYL    | A*02:01 | 17                               | 12                         |              |
| 10 | CMTWNQMNL    | A*02:01 | 17                               | 2                          |              |
| 11 | RWPSCQKKF    | A*24:02 | 11                               |                            |              |
| 12 | CMTWNQMNL    | A*24:02 | 11                               |                            |              |
|    |              |         |                                  | <b>71</b>                  | <b>4</b>     |

Supplemental data 5. Screening approach to select specific and potent WT1-specific T-cell clones

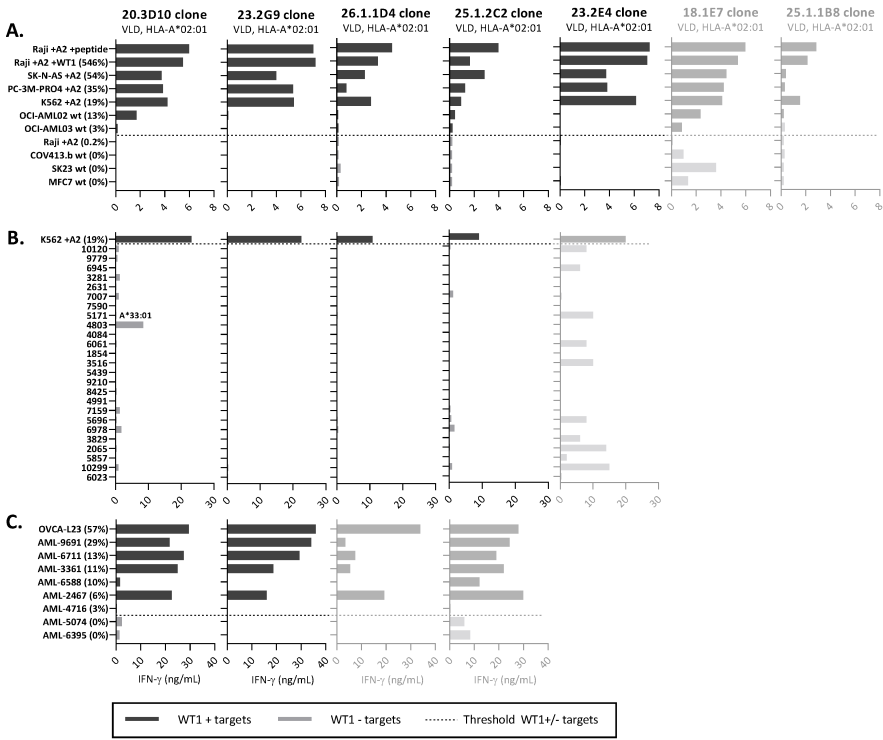



Supplemental data 6. Reactivities by allo-HLA reactive T-cell clones in the included screening panels

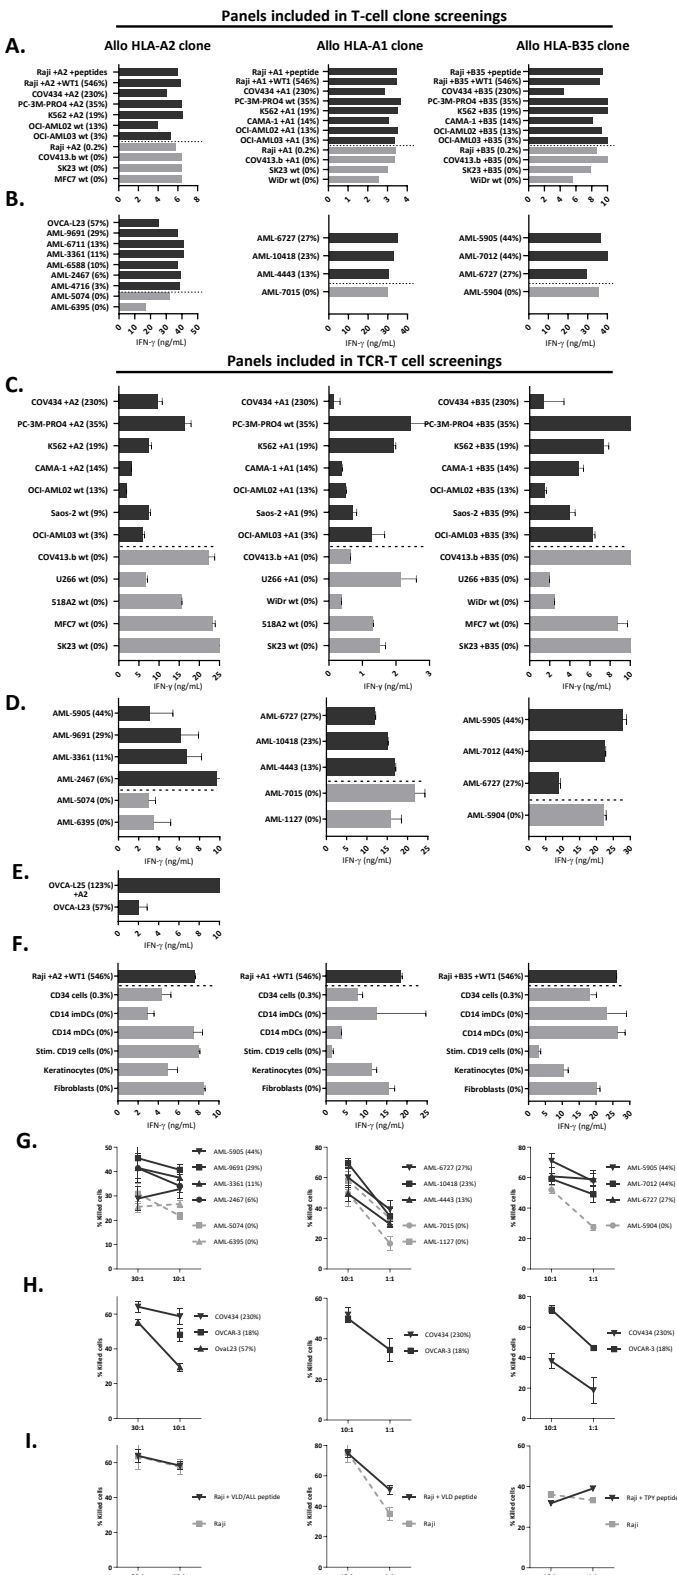

## Supplemental data 7. pMHC-multimer staining and peptide sensitivity of TCR-T cells and their parental T-cell clones

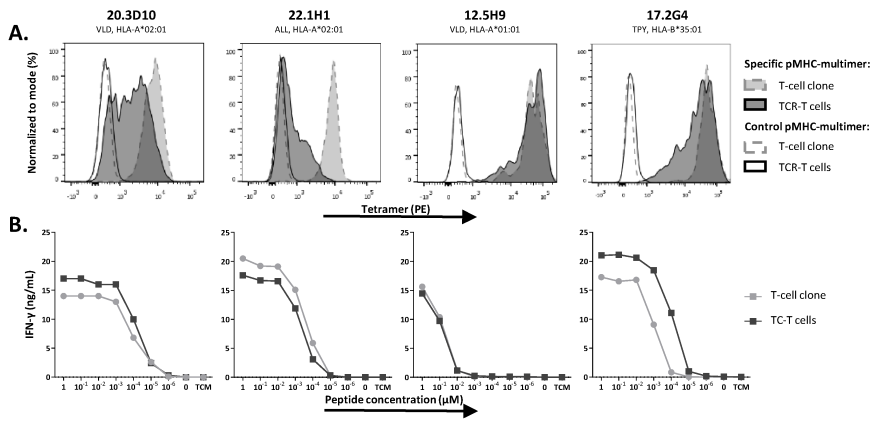

## LEGENDS

### **Supplemental data 1. Overview of the materials included in HLA ligandome analyses**

Overview of the characteristics of materials included in the HLA ligandome analyses from which the WT1 peptides were identified. The materials are indicated per WT1 peptide, including their predicted HLA binding molecule based on NetMHC and best Mascot ion score (BMI). WT1 expression was determined by RT-qPCR (\*ALL-1833 by Illumina HT-12.0 microarray). OVCA: primary ovarian carcinoma, ALL: acute lymphoblastic leukemia, AML: acute myeloid leukemia, HCL: hairy cell leukemia, n.d. = not determined.

### **Supplemental data 2. MS data validation of the eight WT1-derived peptides**

The eight WT1 peptides identified in our HLA ligandome analyses were validated by comparing tandem mass spectra of eluted peptides and synthetic peptides. (A – H) For each peptide the tandem mass spectra of the eluted and synthetic peptides are shown, including the source of the eluted peptide.

### **Supplemental data 3. Overview of the number of T-cell clones screened per healthy donor and T-cell clones reactive against WT1 peptide and/or transduced WT1**

For each healthy donor, HLA class I typing, number of PBMCs, and expanded single-cell sorted T-cell clones are listed. In total 461 of 7916 screened T-cell clones were reactive against Raji pulsed with the WT1 peptide pool (1  $\mu$ M), and 71 clones were also reactive against Raji transduced with WT1. The reactivity is based on IFN- $\gamma$  production (ng/mL) after an overnight co-culture stimulation assay.

### **Supplemental data 4: Overview of T-cell clones reactive against transduced WT1 and those TCRs further analyzed**

Number of healthy donors included in the T-cell search is listed. In total 71 of the isolated T-cell clones were reactive against both Raji pulsed with the WT1 peptide pool and Raji transduced with WT1. The TCRs of four T-cell clones were sequenced and further analyzed.

**Supplemental data 5: Screening approach to select specific and potent WT1-specific T-cell clones**

Recognition patterns by 7 of the 19 T-cell clones recognizing the VLDFAPPGA peptide presented in HLA-A\*02:01. Clone 20.3D10 and 23.2G9 were selected as the most specific and potent T-cell clones. Excluded T-cell clones based on recognition in a panel are blurred. Recognition is based on IFN- $\gamma$  production (ng/mL) after overnight co-culture assays. **(A)** Panel with WT1+ and WT- tumor cell lines (E:T = 1:6). **(B)** Panel with 25 EBV-LCLs, expressing all frequent HLA alleles (with an allele frequency > 1%) present in the Caucasian population (E:T = 1:6). The HLA-allele is depicted if only one HLA-allele is recognized by the T-cell clone, meeting the requirement that all EBV-LCLs with this HLA-allele are recognized. **(C)** Panel with primary AML samples (E:T = 1:16) and OVCA patient samples (E:T = 1:6). All cell lines in panel A and C were HLA-A\*02:01 positive, either wildtype (wt) or the HLA-allele was introduced by transduction (+A2). Percentage relative WT1 expression is depicted, as determined by RT-qPCR. Dark grey bars depict high WT1+ targets and light grey bars the WT1- targets. Bars represent averaged duplicate values and are representative of two independent experiments.

**Supplemental data 6. Reactivities by allo-HLA reactive T-cell clones in the included screening panels**

Reactivities of the positive control T-cell clones that are reactive against a housekeeping gene presented in HLA-A\*02:01, HLA-A\*01:01 or HLA-B\*35:01. **(A-B)** IFN- $\gamma$  production (ng/mL) against the tumor cell line panel and primary AML panel included in T-cell clone screenings, depicted in Supplementary data 5 and Figure 2. **(C-F)** IFN- $\gamma$  production against the tumor cell line panel, primary AML panel, primary OVCA panel, and healthy cell subsets panel included in TCR-T cell screenings, depicted in Figure 4. **(G-I)** Killing percentages of the primary AML panel, OVCA cell line panel, and control panel included in the TCR-T cell screenings, depicted in Figure 5. Values and error bars represent mean and SD of technical duplicates and are representative of two independent experiments.

**Supplemental data 7. pMHC-multimer staining and peptide sensitivity of TCR-T cells and their parental T-cell clones**

T-cell receptors (TCRs) of the four most promising WT1-specific T-cell clones were constructed and introduced in CD8+ cells via retroviral transduction. Shown are representative results of two independent experiments and two CD8+ donors, at day 10 post isolation. **(A)** Flow cytometry plots of purified TCR-T cells and their parental T-cell clones stained with the specific and a control pMHC-multimer. **(B)** IFN- $\gamma$  production (ng/ml) of T cells stimulated with Raji cells (transduced with HLA-A\*01:01 or -B\*35:01) or T2 cells (wildtype HLA-A\*02:01 positive) pulsed with titrated peptide concentrations.
